# Supplementary material
Source: publisher figshare collection journal article supplement (https://acs.figshare.com/ndownloader/files/20549157)
Supplement: Supplementary file 1 [file 20549157]

Supporting Information for

Phosphorus- and Sulfur-Containing High Refractive  
Index Polymers with High  $T_g$  and Transparency Derived  
from A Bio-based Aldehyde

Linxuan Fang, Jing Sun,\* Xiaoyao Chen, Yangqing Tao, Junfeng Zhou, Caiyun  
Wang, and Qiang Fang\*

Key Laboratory of Synthetic and Self-Assembly Chemistry for Organic Functional  
Molecules, Center for Excellence in Molecular Synthesis, Shanghai Institute of  
Organic Chemistry, University of Chinese Academy of Sciences, Chinese Academy  
of Sciences, 345 Lingling Road, Shanghai 200032, P. R. China.

\*E-mail: [qiangfang@mail.sioc.ac.cn](mailto:qiangfang@mail.sioc.ac.cn)

**This supplemental document contains 5 Figures over 5 pages.**

## **Contents:**

- **Characterizations**

**Figure S1.**  $^1\text{H}$  NMR spectrum of **TVP** (400 MHz,  $\text{CDCl}_3$ ).

**Figure S2.** Reflection spectra of free-standing films of **TVP-TH1** and **TVP-TH2**.

**Figure S3.** Variation coefficient of the extinction coefficient of the **TVP-TH1** and **TVP-TH2** films.

**Figure S4.** AFM images of **TVP-TH1** and **TVP-TH2** films on silicon wafers.

**Figure S5.** XRD pattern spectra of free-standing films of **TVP-TH1** and **TVP-TH2**.

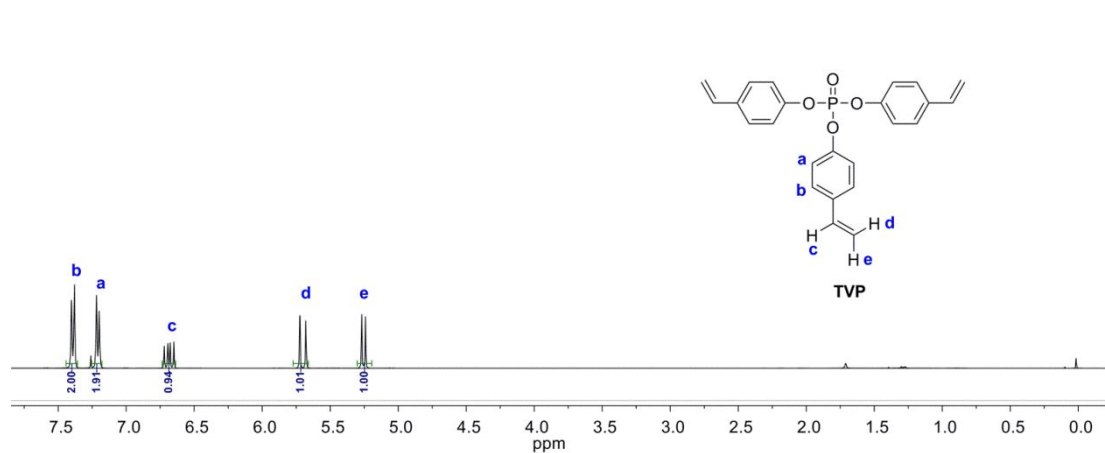

**Figure S1.**  $^1\text{H}$  NMR spectrum of TVP (400 MHz,  $\text{CDCl}_3$ ).

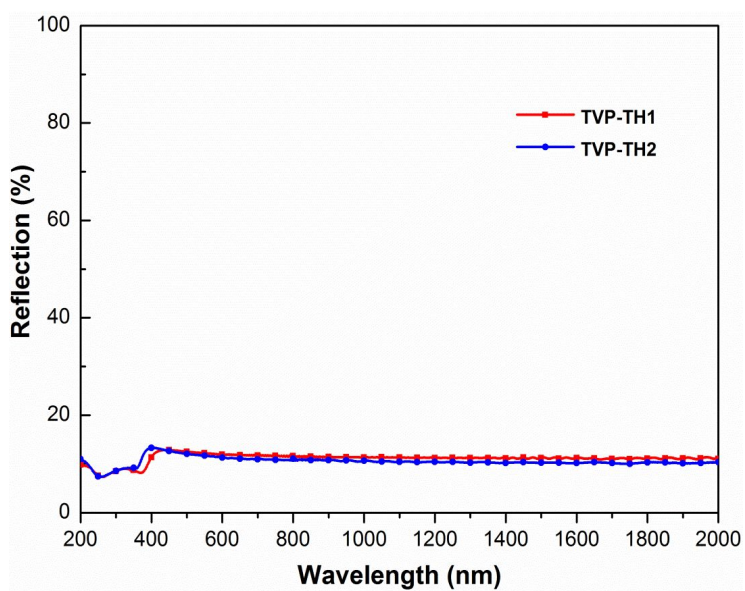

**Figure S2.** Reflection spectra of free-standing films of TVP-TH1 and TVP-TH2.

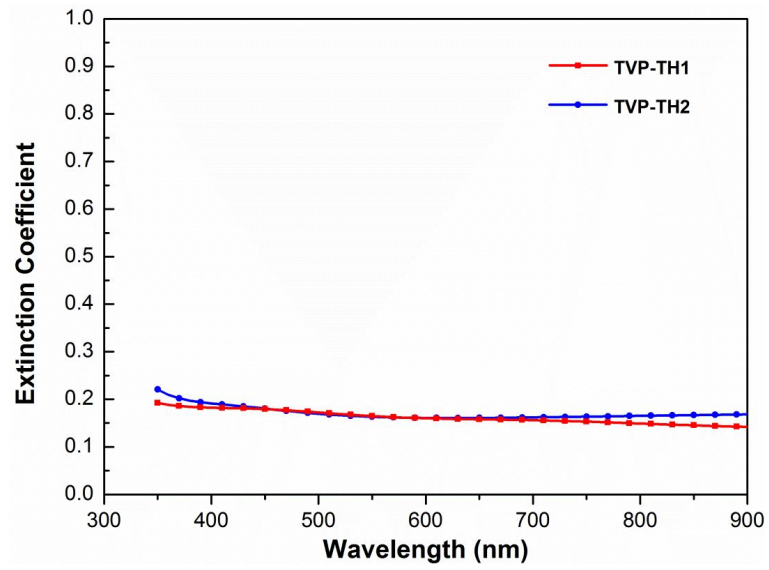

**Figure S3.** Variation coefficient of the extinction coefficient of the **TVP-TH1** and **TVP-TH2** films.

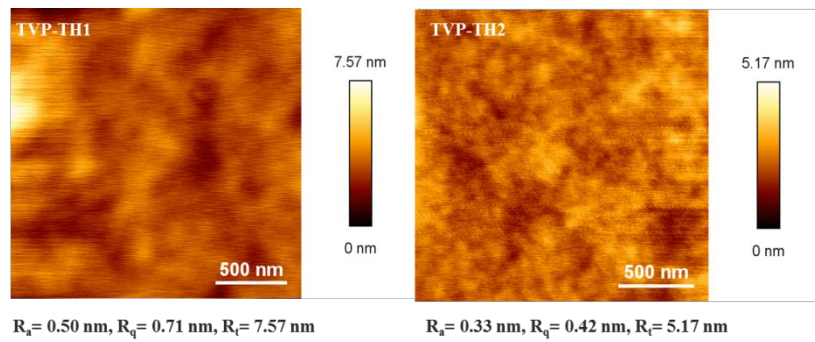

**Figure S4.** AFM images of **TVP-TH1** and **TVP-TH2** films on silicon wafers.

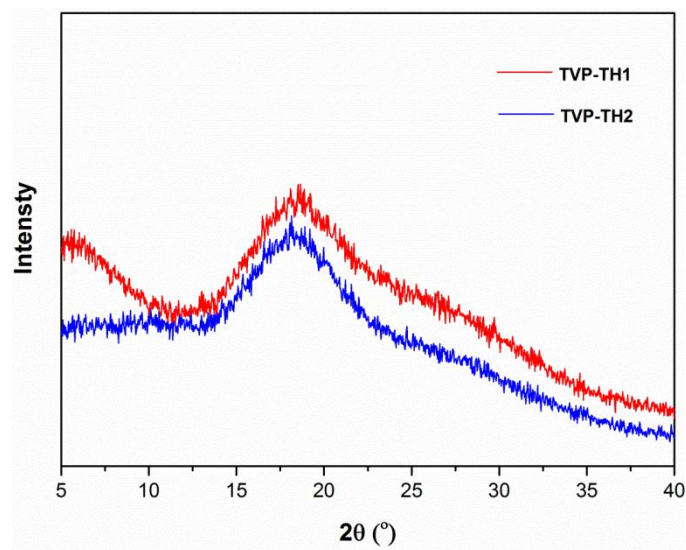

**Figure S5.** XRD pattern of free-standing films of **TVP-TH1** and **TVP-TH2**.
